# Supplementary material
Source: PubMed Central journal article supplement (PMC11556306)

# A biologically based computational model for the hypothalamic-pituitary-thyroid (HPT) axis in *X. laevis* larvae

Jonathan T. Haselman, John W. Nichols, Kali Z. Mattingly, Michael W. Hornung and Sigmund J. Degitz

## Supplemental Information SI7

Mean residual plot for model performance relative to calibration data

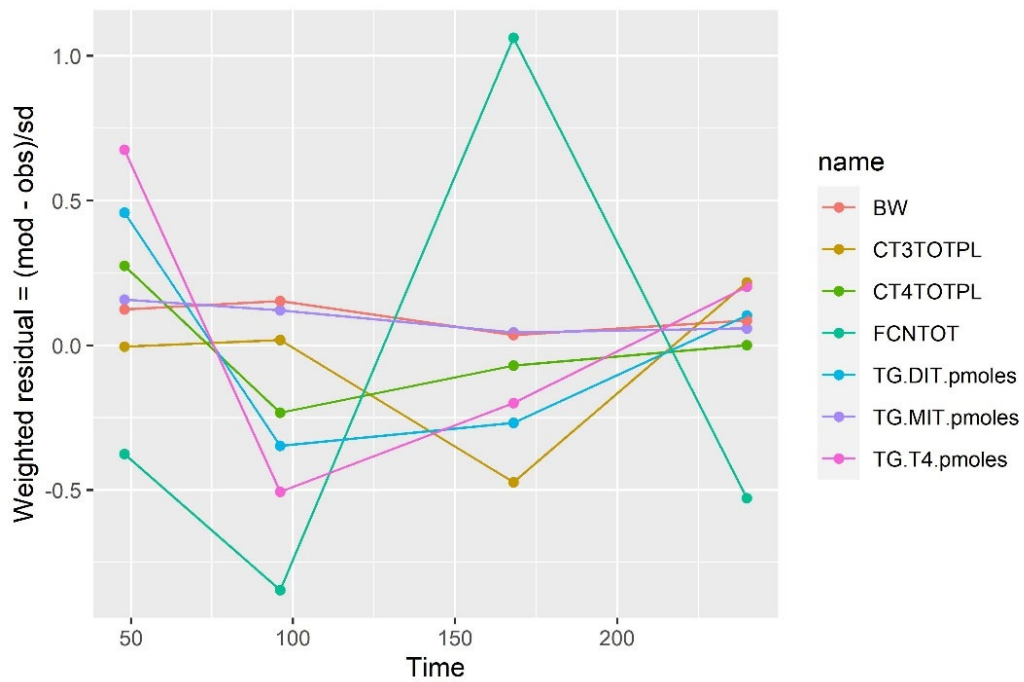

Supplement: NIHMS1953607-supplement-s7.pdf [file NIHMS1953607-supplement-s7.pdf]
