# Supplementary material
Source: PubMed Central journal article supplement (PMC11556306)
Supplement: NIHMS1953607-supplement-s8.pdf [file NIHMS1953607-supplement-s8.pdf]

```

1 #####
2 ## Title: Analysis of the sensitivity of model estimates to parameters ##
3 ## ##
4 ## Script author: Kali Z. Mattingly ##
5 ## ##
6 ## Date created: 08-31-2022 ##
7 ## ##
8 ## Email: mattingly.kali@epa.gov ##
9 ## ##
10 ## Citation: Haselman, J.T., Nichols, J.W., Mattingly, K.Z., Hornung, M.W. ##
11 ## and Degitz, S.J. 2023. A Biologically Based Computational ##
12 ## Model for the Hypothalamic-Pituitary-Thyroid (HPT) Axis in ##
13 ## Xenopus laevis larvae. Mathematical Biosciences (submitted) ##
14 ## ##
15 #####
16
17 ##### Before running these analyses, run "Scripts/Amphibian_Thyroid_Model.R"
18 # needed to load packages, `dynmodel()`, `dynout`, `parameters` into environment #####
19
20 install.packages("reshape2")
21
22 library(reshape2)
23
24 options(scipen=500)
25
26 ##### Calculate normalized sensitivity coefficient (NSC) #####
27
28 # original parameters
29 param_orig <- parameters
30
31 # parameters + 1%
32 addone <- function(value) {return(value+(value*0.01))}
33 param_plus1 <- addone(param_orig)
34
35 # original response variable values at time points of interest
36 # times: 2, 4, 7 and 10 days (48, 96, 168 and 240 hours)
37 # response variables: plasma T4 (CT4TOTPL), plasma T3 (CT3TOTPL), follicular
38 # cell number (FCNTOT), gland MIT (TG.MIT.pmoles)
39 var_orig <- dynout[, c("time", "CT4TOTPL", "CT3TOTPL", "FCNTOT", "TG.MIT.pmoles")]
40 var_orig <- var_orig[var_orig$time==48 | var_orig$time==96 | var_orig$time==168
41 | var_orig$time==240, ]
42 var_orig <- melt(data.table(var_orig), id.vars=c("time"),
43 measure.vars=c("CT4TOTPL", "CT3TOTPL", "FCNTOT", "TG.MIT.pmoles"),
44 value.name="var_orig") # long format
45
46 # NSC function
47 NSC <- function(var_orig, var_plus1, param_orig, param_plus1)
48 {return(((var_plus1 - var_orig) / var_orig) / ((param_plus1 - param_orig) / param_orig
49 ))}
50
51 # initialize a csv for saving NSC output as we step through the loop
52 output <- c("parameter", "time_hr", "variable", "var_plus1_A", "var_orig_B",
53 "param_plus1_C", "param_orig_D", "NSC")
54 write.table(t(output), "Output/Sensitivity output.csv", sep=",", col.names=FALSE)
55
56 # step through the 33 params
57 for (i in c(1:length(param_plus1))) {
58 # take param_orig and sub out only this focal param_plus1[i]
59 param_temp <- param_orig
60 param_temp[i] <- param_plus1[i]
61
62 # rerun dynmodel() with this subbed set of params
63 out_temp <- ode(y = state, times = times, func = dynmodel, parms = param_temp, method =
64 "rk4")
65 dynout_temp <- as.data.frame(out_temp)

```

```

65 colnames(dynout_temp) <- make.unique(names(dynout_temp))
66
67 # extract the var_plus1 values of interest (in same format as var_orig)
68 var_plus1 <- dynout_temp[, c("time", "CT4TOTPL", "CT3TOTPL", "FCNTOT", "TG.MIT.pmoles"
69 )]
70 var_plus1 <- var_plus1[var_plus1$time==48 | var_plus1$time==96 | var_plus1$time==168 |
71 var_plus1$time==240, ]
72 var_plus1 <- melt(data.table(var_plus1), id.vars=c("time"),
73 measure.vars=c("CT4TOTPL", "CT3TOTPL", "FCNTOT", "TG.MIT.pmoles"),
74 value.name="var_plus1")
75
76 # match up orig and corresponding plus_1
77 output <- merge(var_orig, var_plus1, by.x=c("time", "variable"), by.y=c("time",
78 "variable"))
79 colnames(output)[1] <- "time_hr"
80
81 # add param_orig[i] and param_plus1[i]
82 output$param_orig <- param_orig[i]
83 output$param_plus1 <- param_plus1[i]
84
85 # calculate the NSCs for that set of 4 vars x 4 time points
86 output$NSC <- NSC(output$var_orig, output$var_plus1, output$param_orig, output$
87 param_plus1)
88 colnames(output)[3] <- paste(colnames(output)[3], "B", sep="_")
89 colnames(output)[4] <- paste(colnames(output)[4], "A", sep="_")
90 colnames(output)[5] <- paste(colnames(output)[5], "D", sep="_")
91 colnames(output)[6] <- paste(colnames(output)[6], "C", sep="_")
92
93 # save the name of the focal parameter that was being tested
94 output$parameter <- names(param_plus1[i])
95
96 # reorganize
97 output <- output[,c(8,1,2,4,3,6,5,7)]
98
99 # print these 16 rows as appended lines in the csv
100 write.table(output, "Output/Sensitivity output.csv", append=TRUE, sep=",", col.names=
FALSE)
}

```
